# Supplementary material for: Synthesis of novel fused heterocycle-oxa-aza-phenanthrene and anthracene derivatives via sequential one-pot synthesis in aqueous micellar system
Source: Royal Society of Chemistry journal article supplement (doi:10.1039/c2gc16425f), 2012-01-01
Supplement: c2gc16425f.pdf [file c2gc16425f.pdf]

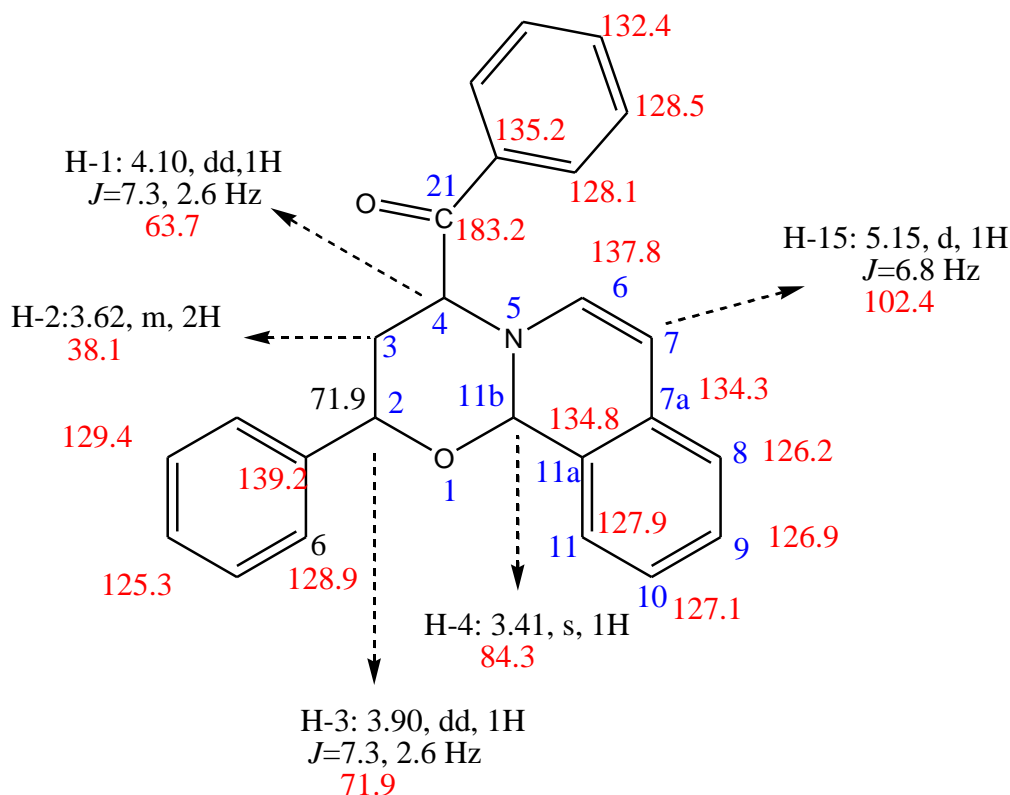

Remaining all 13 H fall in aromatic region between 6.92 -7.50 ppm

NMR (400 MHz,  $\text{CDCl}_3$ )  $\delta_{\text{H}}$  (ppm) 3.41 (s, 1H, **11b-H**), 3.62-3.66 (m, 2H, **3-Ha & 3-Hb**), 3.90 (dd, 1H,  $J_{3\text{Ha},2\text{H}}=7.3$  Hz,  $J_{3\text{Hb},2\text{H}}=2.6$  Hz, **2-H**), 4.10 (dd, 1H,  $J_{3\text{Ha},4\text{H}}=7.3$  Hz,  $J_{3\text{Hb},4\text{H}}=2.4$  Hz, **4-H**), 5.15 (d, 1H,  $J_{7\text{H},4\text{H}}=6.8$ , **7-H**), 6.92-7.50 (m, 13H, **6-H, 8-H, 11-H & Ar-H**), 8.04 (d, 2H,  $J=6.2$ , **Ar-H**).  $^{13}\text{C}$  NMR (100 MHz,  $\text{CDCl}_3$ )  $\delta_{\text{C}}$  (ppm) 38.1 (**3-C**), 63.7 (**4-C**), 71.9 (**2-C**), 84.3 (**11b-C**), 102.4 (**7-C**), 125.3 (**arom-C**), 126.2 (**8-C**), 126.9 (**9-C**), 127.1 (**10-C**), 127.9 (**11-C**), 128.1 (**arom-C**), 128.5 (**arom-C**), 128.9 (**arom-C**), 129.4 (**arom-C**), 132.4 (**arom-C**), 134.3 (**7a-C**), 134.8 (**11a-C**), 135.2 (**arom-C**), 137.8 (**6-C**), 139.2 (**arom-C**), 183.2 (**CO**). EIMS ( $m/z$ ): 367( $\text{M}^+$ ). Anal. Calc for  $\text{C}_{25}\text{H}_{21}\text{NO}_2$ ; C, 81.72; H, 5.76; N, 3.81. Found: C, 81.68; H, 6.79; N, 3.83.
